# Supplementary material for: Qualitative and Quantitative Analysis of Rhizoma Smilacis glabrae by Ultra High Performance Liquid Chromatography Coupled with LTQ OrbitrapXL Hybrid Mass Spectrometry
Source: MDPI journal article supplement (doi:10.3390/molecules190710427), 2014-07-17

# Supplementary Information

**Figure S1.** The chemical structures of identified compounds of *Smilacis glabrae* extract.

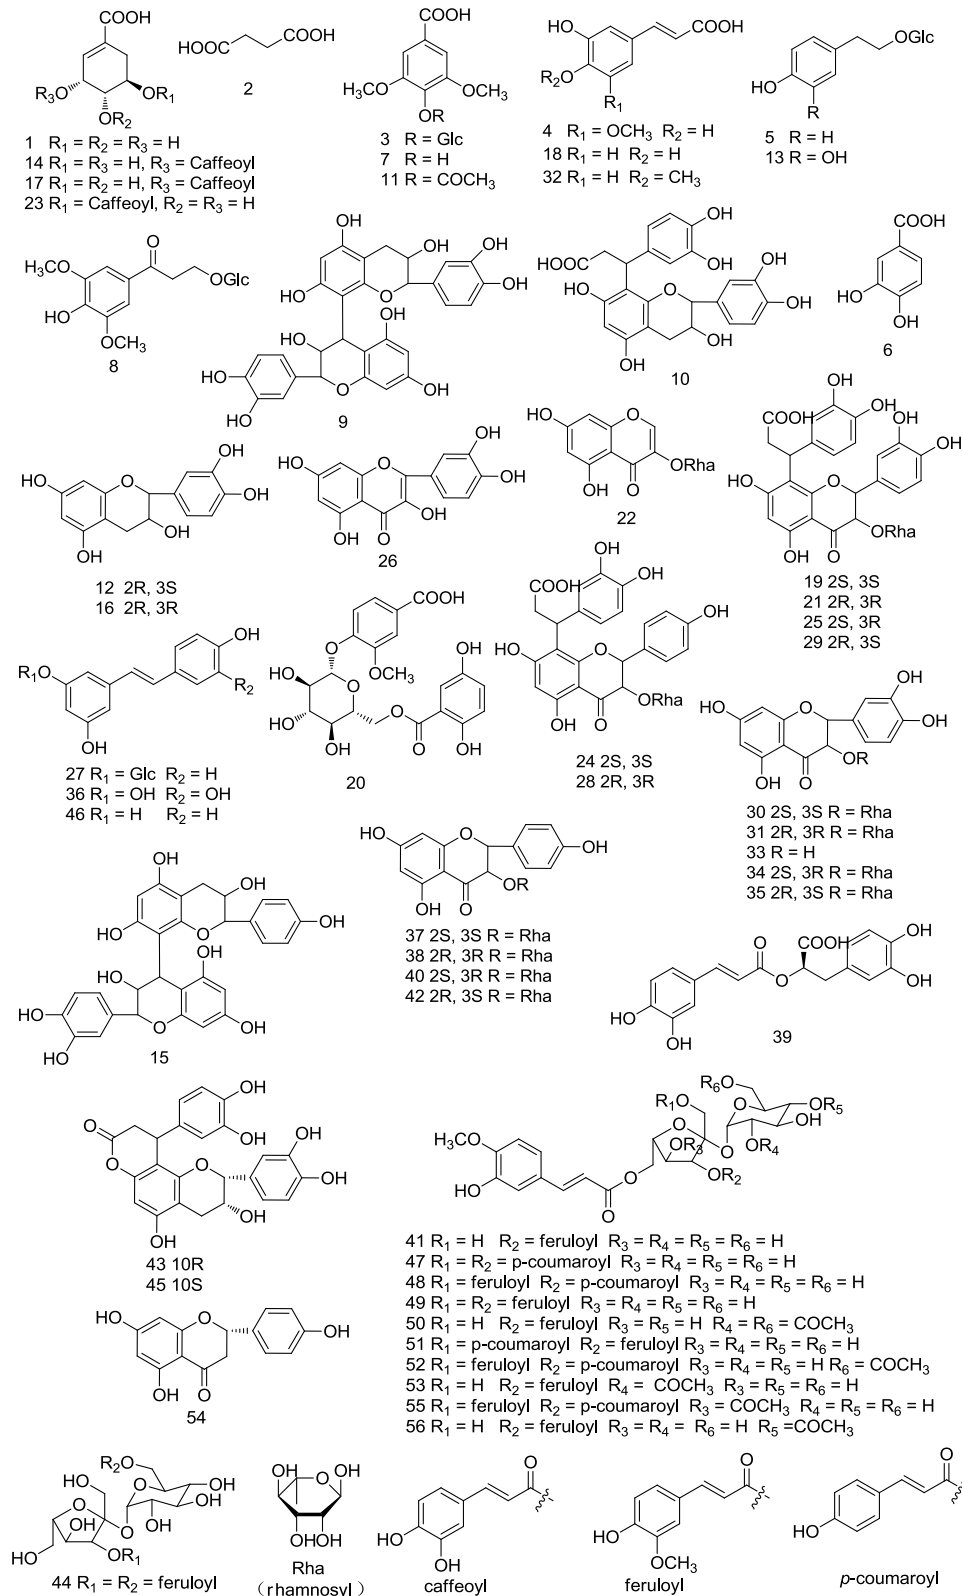

**Figure S2.** UV spectra of compounds **30**, **31**, **34**, **35** and **19**, **21**, **25**, **29**.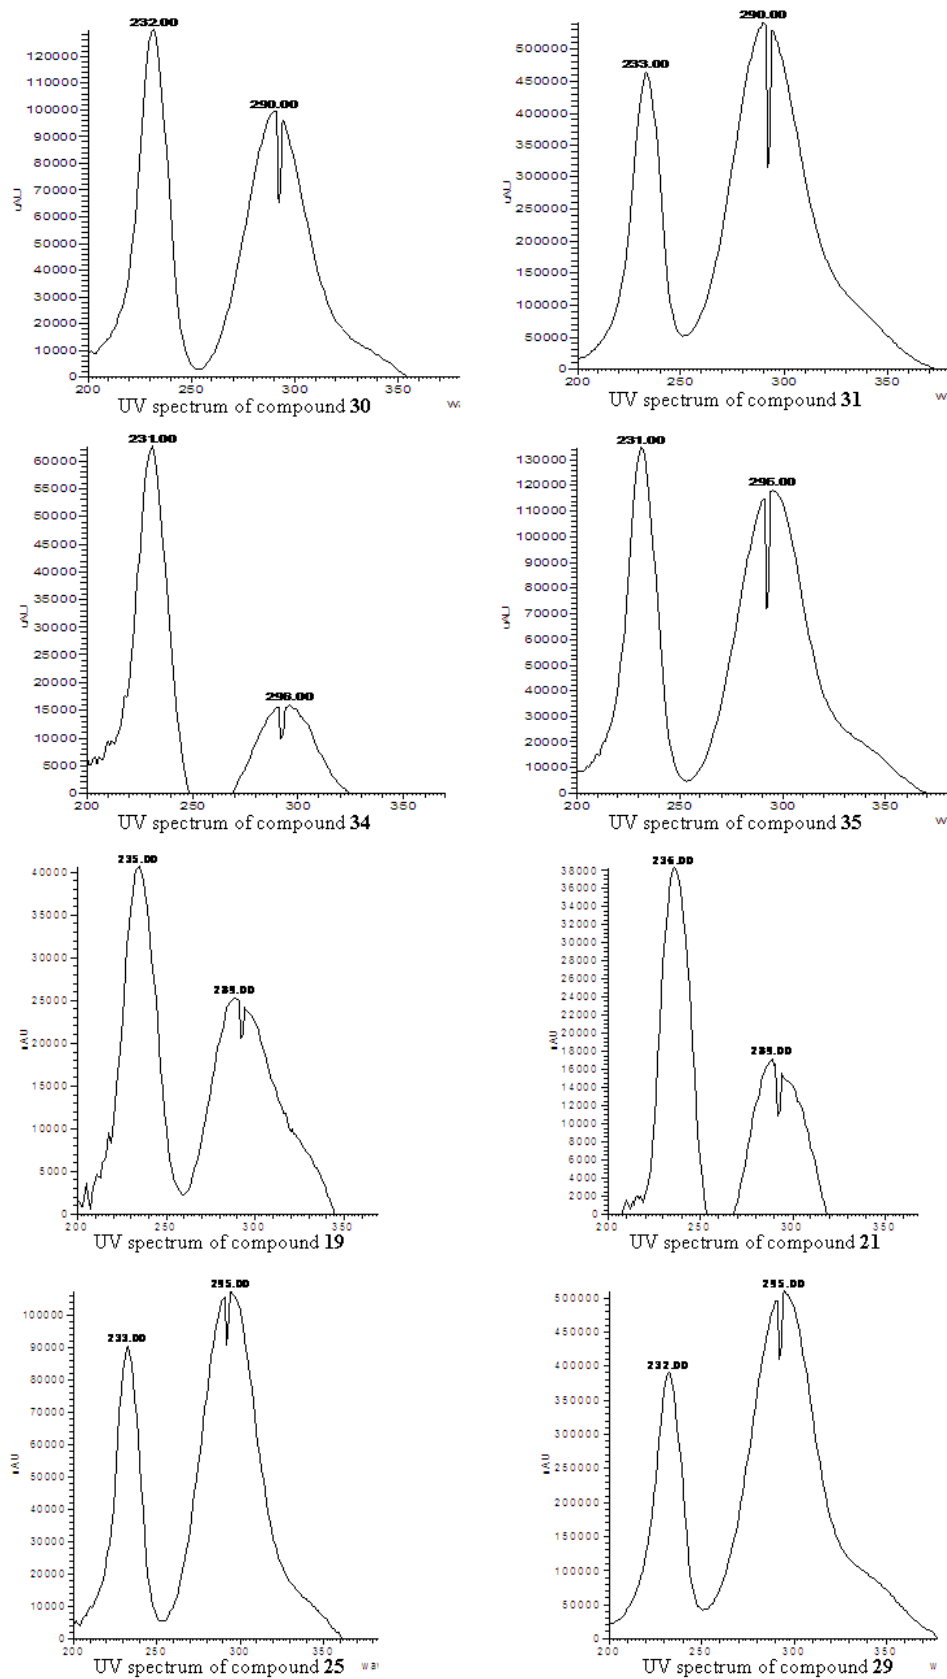

**Figure S3.** Proposed fragmentation pathway for compounds **24** and **28**.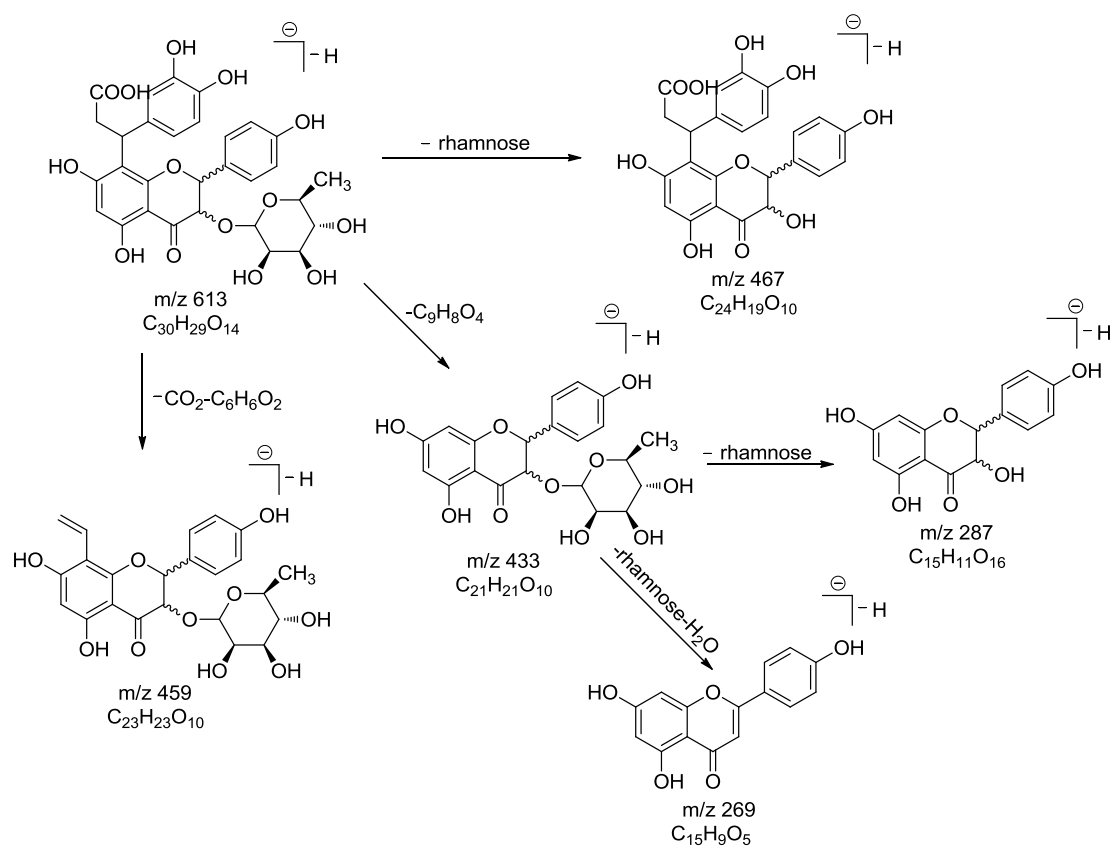

Supplement: s1 [file s1]
